# Supplementary material for: Implementing Spatio-Temporal 3D-Convolution Neural Networks and UAV Time Series Imagery to Better Predict Lodging Damage in Sorghum
Source: MDPI journal article supplement (doi:10.3390/rs14030733), 2022-02-04
Supplement: s1 [file s1]

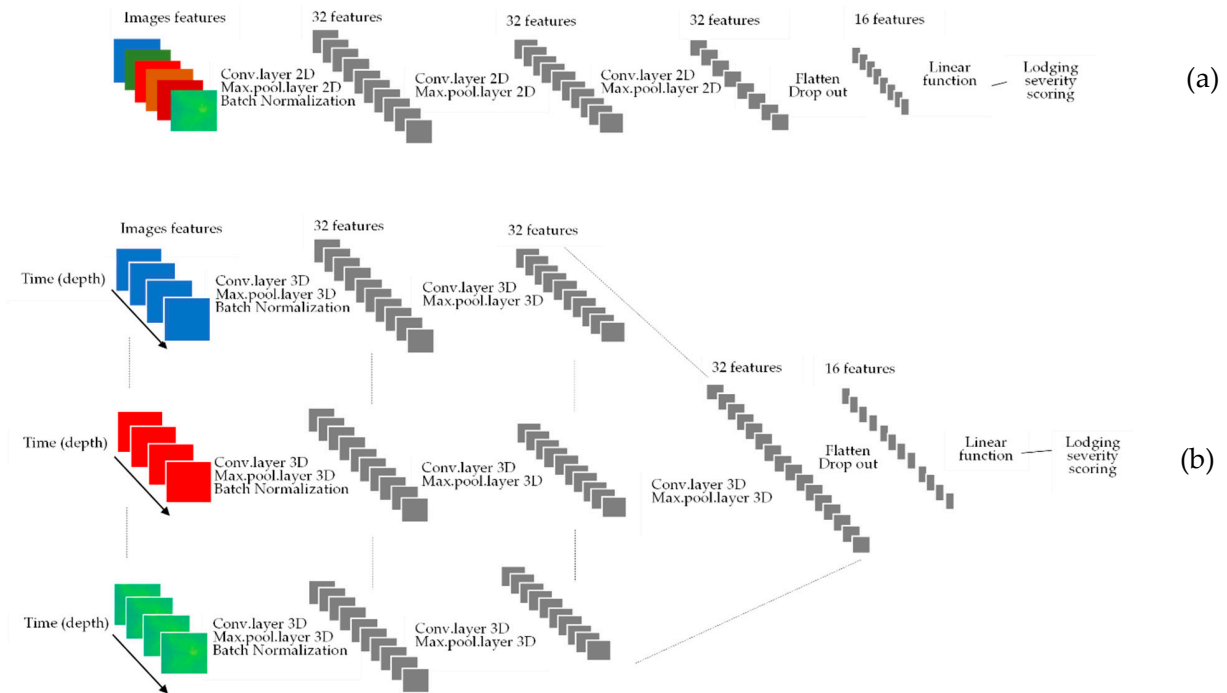

Figure S1. Diagram of custom CNN architectures utilized to assess lodging severity, 2D-CNN (a) and 3D-CNN (b).

Table S1. Description of the 60 CNN models implemented according to combinations of UAV-based image features, CNN architectures, and target traits.

| Model name          | Image features    | Trait             | Statistical method | Model architecture | Time length | Flights DAPs included |
|---------------------|-------------------|-------------------|--------------------|--------------------|-------------|-----------------------|
| RGB_TP_75 (1)       | RGB               | Lodging detection | Classification     | 2D-CNN             | 1           | 75                    |
| RGB_TP_75 (1)       | RGB               | Lodging severity  | Regression         | 2D-CNN             | 1           | 75                    |
| MS_TP_75 (1)        | RGB, Re, NIR      | Lodging detection | Classification     | 2D-CNN             | 1           | 75                    |
| MS_TP_75 (1)        | RGB, Re, NIR      | Lodging severity  | Regression         | 2D-CNN             | 1           | 75                    |
| CSM_MS_TP_75 (1)    | RGB, Re, NIR, CSM | Lodging detection | Classification     | 2D-CNN             | 1           | 75                    |
| CSM_MS_TP_75 (1)    | RGB, Re, NIR, CSM | Lodging severity  | Regression         | 2D-CNN             | 1           | 75                    |
| RGB_TP_83 (1)       | RGB               | Lodging detection | Classification     | 2D-CNN             | 1           | 83                    |
| RGB_TP_83 (1)       | RGB               | Lodging severity  | Regression         | 2D-CNN             | 1           | 83                    |
| MS_TP_83 (1)        | RGB, Re, NIR      | Lodging detection | Classification     | 2D-CNN             | 1           | 83                    |
| MS_TP_83 (1)        | RGB, Re, NIR      | Lodging severity  | Regression         | 2D-CNN             | 1           | 83                    |
| CSM_MS_TP_83 (1)    | RGB, Re, NIR, CSM | Lodging detection | Classification     | 2D-CNN             | 1           | 83                    |
| CSM_MS_TP_83 (1)    | RGB, Re, NIR, CSM | Lodging severity  | Regression         | 2D-CNN             | 1           | 83                    |
| RGB_TP_88 (1)       | RGB               | Lodging detection | Classification     | 2D-CNN             | 1           | 88                    |
| RGB_TP_88 (1)       | RGB               | Lodging severity  | Regression         | 2D-CNN             | 1           | 88                    |
| MS_TP_88 (1)        | RGB, Re, NIR      | Lodging detection | Classification     | 2D-CNN             | 1           | 88                    |
| MS_TP_88 (1)        | RGB, Re, NIR      | Lodging severity  | Regression         | 2D-CNN             | 1           | 88                    |
| CSM_MS_TP_88 (1)    | RGB, Re, NIR, CSM | Lodging detection | Classification     | 2D-CNN             | 1           | 88                    |
| CSM_MS_TP_88 (1)    | RGB, Re, NIR, CSM | Lodging severity  | Regression         | 2D-CNN             | 1           | 88                    |
| RGB_TP_97 (1)       | RGB               | Lodging detection | Classification     | 2D-CNN             | 1           | 97                    |
| RGB_TP_97 (1)       | RGB               | Lodging severity  | Regression         | 2D-CNN             | 1           | 97                    |
| MS_TP_97 (1)        | RGB, Re, NIR      | Lodging detection | Classification     | 2D-CNN             | 1           | 97                    |
| MS_TP_97 (1)        | RGB, Re, NIR      | Lodging severity  | Regression         | 2D-CNN             | 1           | 97                    |
| CSM_MS_TP_97 (1)    | RGB, Re, NIR, CSM | Lodging detection | Classification     | 2D-CNN             | 1           | 97                    |
| CSM_MS_TP_97 (1)    | RGB, Re, NIR, CSM | Lodging severity  | Regression         | 2D-CNN             | 1           | 97                    |
| RGB_TR_69_83 (2)    | RGB               | Lodging detection | Classification     | 3D-CNN             | 2           | 69,83                 |
| RGB_TR_69_83 (2)    | RGB               | Lodging severity  | Regression         | 3D-CNN             | 2           | 69,83                 |
| MS_TR_69_83 (2)     | RGB, Re, NIR      | Lodging detection | Classification     | 3D-CNN             | 2           | 69,83                 |
| MS_TR_69_83 (2)     | RGB, Re, NIR      | Lodging severity  | Regression         | 3D-CNN             | 2           | 69,83                 |
| CSM_MS_TR_69_83 (2) | RGB, Re, NIR, CSM | Lodging detection | Classification     | 3D-CNN             | 2           | 69,83                 |
| CSM_MS_TP_69_83 (2) | RGB, Re, NIR, CSM | Lodging severity  | Regression         | 3D-CNN             | 2           | 69,83                 |
| RGB_TR_75_83 (2)    | RGB               | Lodging detection | Classification     | 3D-CNN             | 2           | 75,83                 |

|                           |                   |                   |                |        |   |                            |
|---------------------------|-------------------|-------------------|----------------|--------|---|----------------------------|
| RGB_TR_75_83 (2)          | RGB               | Lodging severity  | Regression     | 3D-CNN | 2 | 75,83                      |
| MS_TR_75_83 (2)           | RGB, Re, NIR      | Lodging detection | Classification | 3D-CNN | 2 | 75,83                      |
| MS_TR_75_83 (2)           | RGB, Re, NIR      | Lodging severity  | Regression     | 3D-CNN | 2 | 75,83                      |
| CSM_MS_TR_75_83 (2)       | RGB, Re, NIR, CSM | Lodging detection | Classification | 3D-CNN | 2 | 75,83                      |
| CSM_MS_TP_75_83 (2)       | RGB, Re, NIR, CSM | Lodging severity  | Regression     | 3D-CNN | 2 | 75,83                      |
| RGB_TR_69_75_83 (3)       | RGB               | Lodging detection | Classification | 3D-CNN | 3 | 69,75,83                   |
| RGB_TR_69_75_83 (3)       | RGB               | Lodging severity  | Regression     | 3D-CNN | 3 | 69,75,83                   |
| MS_TR_69_75_83 (3)        | RGB, Re, NIR      | Lodging detection | Classification | 3D-CNN | 3 | 69,75,83                   |
| MS_TR_69_75_83 (3)        | RGB, Re, NIR      | Lodging severity  | Regression     | 3D-CNN | 3 | 69,75,83                   |
| CSM_MS_TR_69_75_83 (3)    | RGB, Re, NIR, CSM | Lodging detection | Classification | 3D-CNN | 3 | 69,75,83                   |
| CSM_MS_TP_69_75_83 (3)    | RGB, Re, NIR, CSM | Lodging severity  | Regression     | 3D-CNN | 3 | 69,75,83                   |
| RGB_TR_69_75_83 (3)       | RGB               | Lodging detection | Classification | 3D-CNN | 3 | 69,75,83                   |
| RGB_TR_83_88_97 (3)       | RGB               | Lodging severity  | Regression     | 3D-CNN | 3 | 83,88,97                   |
| MS_TR_83_88_97 (3)        | RGB, Re, NIR      | Lodging detection | Classification | 3D-CNN | 3 | 83,88,97                   |
| MS_TR_83_88_97 (3)        | RGB, Re, NIR      | Lodging severity  | Regression     | 3D-CNN | 3 | 83,88,97                   |
| CSM_MS_TR_83_88_97 (3)    | RGB, Re, NIR, CSM | Lodging detection | Classification | 3D-CNN | 3 | 83,88,97                   |
| CSM_MS_TP_83_88_97 (3)    | RGB, Re, NIR, CSM | Lodging severity  | Regression     | 3D-CNN | 3 | 83,88,97                   |
| RGB_TR_62_69_75_83 (4)    | RGB               | Lodging detection | Classification | 3D-CNN | 4 | 62,69,75,83                |
| RGB_TR_62_69_75_83 (4)    | RGB               | Lodging severity  | Regression     | 3D-CNN | 4 | 62,69,75,83                |
| MS_TR_62_69_75_83 (4)     | RGB, Re, NIR      | Lodging detection | Classification | 3D-CNN | 4 | 62,69,75,83                |
| MS_TR_62_69_75_83 (4)     | RGB, Re, NIR      | Lodging severity  | Regression     | 3D-CNN | 4 | 62,69,75,83                |
| CSM_MS_TR_62_69_75_83 (4) | RGB, Re, NIR, CSM | Lodging detection | Classification | 3D-CNN | 4 | 62,69,75,83                |
| CSM_MS_TP_62_69_75_83 (4) | RGB, Re, NIR, CSM | Lodging severity  | Regression     | 3D-CNN | 4 | 62,69,75,83                |
| RGB_TR_31:83 (9)          | RGB               | Lodging detection | Classification | 3D-CNN | 9 | 31,38,42,49,55,62,69,75,83 |
| RGB_TR_31:83 (9)          | RGB               | Lodging severity  | Regression     | 3D-CNN | 9 | 31,38,42,49,55,62,69,75,83 |
| MS_TR_31:83 (9)           | RGB, Re, NIR      | Lodging detection | Classification | 3D-CNN | 9 | 31,38,42,49,55,62,69,75,83 |
| MS_TR_31:83 (9)           | RGB, Re, NIR      | Lodging severity  | Regression     | 3D-CNN | 9 | 31,38,42,49,55,62,69,75,83 |
| CSM_MS_TR_31:83 (9)       | RGB, Re, NIR, CSM | Lodging detection | Classification | 3D-CNN | 9 | 31,38,42,49,55,62,69,75,83 |
| CSM_MS_TP_31:83 (9)       | RGB, Re, NIR, CSM | Lodging severity  | Regression     | 3D-CNN | 9 | 31,38,42,49,55,62,69,75,83 |

R=red, G=green, B=blue spectral bands

Re=red edge, NIR=near-infrared spectral bands

CSM=Crop surface model or 3D-photogrammetry reconstruction of the canopy

RGB=model includes R,G,B spectral channels features

MS=model includes R,G,B,Re,NIR spectral channels features

CSM\_MS=model includes R,G,B,Re,NIR, spectral channels and CSM features

\_TP\_=time-point model

\_TR\_=time-range model

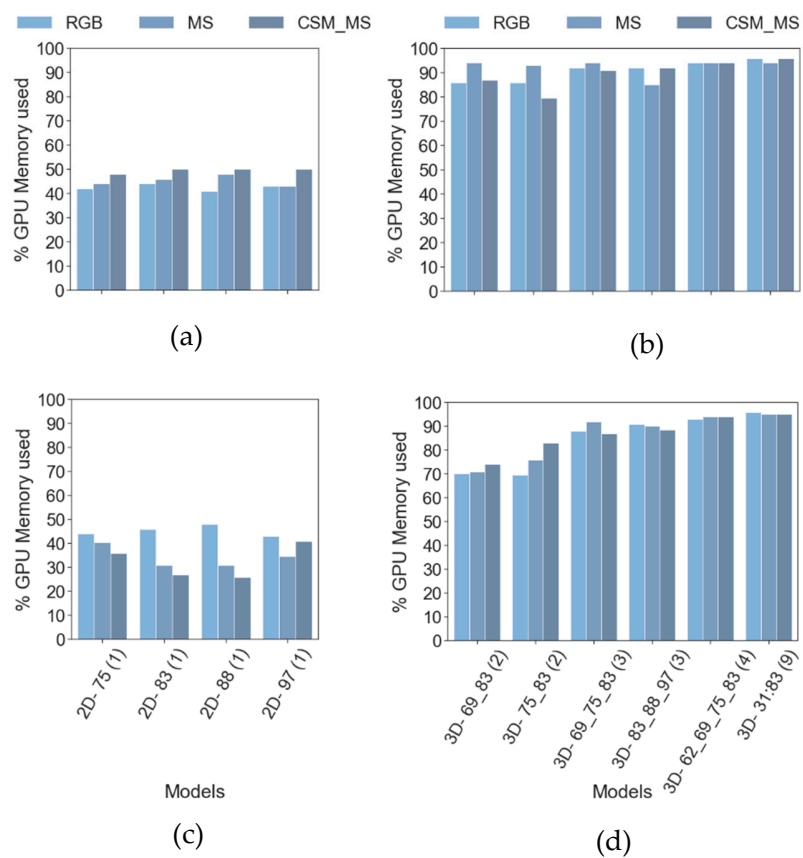

Figure S2. Utilization of GPU memory during models training, validation, and testing steps for lodging detection prediction via 2D-models (a) and 3D-models (b), and lodging severity prediction via 2D-models (c) and 3D-models (d), respectively.
